# Supplementary material for: Modelling the epidemic trend of the 2019 novel coronavirus outbreak in China
Source: bioRxiv or medRxiv preprint supplement (doi:10.1101/2020.01.23.916726), 2020-01-25
Supplement: Supplementary file [file media-1.pdf]

## Supplementary Appendix:

### Modelling the epidemic trend of the 2019 novel coronavirus outbreak in China

Mingwang Shen<sup>1,#</sup>, Zhihang Peng<sup>2,#</sup>, Yanni Xiao<sup>3,\*</sup>, Lei Zhang<sup>1,4,5,6\*</sup>

1. China-Australia Joint Research Center for Infectious Diseases, School of Public Health, Xi'an Jiaotong University Health Science Center, Xi'an, Shaanxi, 710061, PR China.
2. Department of Epidemiology and Biostatistics, School of Public Health, Nanjing Medical University, Nanjing, Jiangsu, 210029, PR China.
3. School of Mathematics and Statistics, Xi'an Jiaotong University, Xi'an, Shaanxi, 710049, PR China.
4. Melbourne Sexual Health Centre, Alfred Health, Melbourne, Australia.
5. Central Clinical School, Faculty of Medicine, Nursing and Health Sciences, Monash University, Melbourne, VIC, Australia.
6. School of Public Health and Preventive Medicine, Faculty of Medicine, Nursing and Health Sciences, Monash University, Melbourne, VIC, Australia.

# Authors contribute equally.

\*Corresponding author (email: [lei.zhang1@xjtu.edu.cn](mailto:lei.zhang1@xjtu.edu.cn), [yxiao@mail.xjtu.edu.cn](mailto:yxiao@mail.xjtu.edu.cn))

This is a supplementary document describing mathematical modelling details presented in the main text and parameters estimation.

## 32 1. Model formulation

33 We proposed a dynamic compartmental model to describe the transmission of 2019-nCov in  
34 China. The population was divided into five compartments: susceptible individuals ( $S$ ),  
35 asymptomatic individuals during the incubation period ( $E$ ), infectious individuals with  
36 symptoms ( $I$ ), isolated individuals with treatment ( $J$ ), and recovered individuals ( $R$ ). The total  
37 population size was denoted as  $N$ , ( $N=S+E+I+J+R$ ). Susceptible individuals became infected  
38 by being in contact with the infectious individuals and entered the latent compartment at the  
39 rate  $\beta(t)SI/N$ , where  $\beta(t) = \beta e^{-m(t-\tau)}$ , of which  $\beta$  denoted the mean person-to-person  
40 transmission rate per day in the absence of control interventions,  $\tau$  denoted the time when the  
41 control interventions began, and  $m$  denoted the decay of transmission rate due to integrated  
42 interventions. Individuals in the incubation period progressed to the infectious compartment  
43 at a rate  $k$ , and infectious individuals were diagnosed and isolated at the rate  $\alpha$ . We assumed  
44 strict isolation that isolated individuals could not further infect others. Isolated individuals  
45 recovered at the rate  $\gamma$  or died due to the disease at the rate  $\mu$ . The model was described by the  
46 following system of ordinary differential equations:

$$\begin{cases} \frac{dS}{dt} = -\beta(t) \frac{SI}{N}, \\ \frac{dE}{dt} = \beta(t) \frac{SI}{N} - kE, \\ \frac{dI}{dt} = kE - \alpha I, \\ \frac{dJ}{dt} = \alpha I - (\gamma + \mu)J, \\ \frac{dR}{dt} = \gamma J. \end{cases} \quad (1)$$

48 The cumulative number of infected cases  $C$  and deaths  $D$  ( $C$  and  $D$  were not epidemiological  
49 states) were governed by the equations

$$\frac{dC}{dt} = kE, \quad \frac{dD}{dt} = \mu J. \quad (2)$$

51 The basic ( $R_0$ ) and effective ( $R_e(t)$ ) reproduction numbers have been previously defined [1,2],  
52 they were  $R_0 = \frac{\beta}{\alpha}$  and  $R_e(t) = \frac{\beta(t) S}{\alpha N}$ .

53

## 54 2. Data sources and parameter estimation

55 We obtained the number of cumulative confirmed cases and deaths from the Wuhan  
56 Municipal Health Commission [3] and the National Health Commission of the People's  
57 Republic of China [4] (Table S1). The first diagnosis was reported on 12<sup>th</sup> December 2019  
58 and we used this date as the starting date for the epidemic ( $t=0$ ). Data from this day until 22<sup>nd</sup>  
59 January 2020 were calibrated using Eq. (2) to estimate the unknown parameters. The mean  
60 incubation time for 2019-nCov was five days ( $1/k=5$ ) and the mean 'time from symptoms  
61 onset to isolation' was six days ( $1/\alpha =6$ ) [5,6]. We used these two values as prior information  
62 for Markov chain Monte Carlo (MCMC) simulations [7]. The mean time from isolation to  
63 recovery is chosen as 6 days ( $1/\gamma =6$ ). The total population size in China was chosen as  
64 1,400,050,000 as in 2019 [8]. We assumed the integrated interventions were implemented  
65 after the appearance of the first infected case, i.e.,  $\tau=0$ . The initial values of the disease states  
66 were given as  $E(0)=0$ ,  $I(0)=1$ ,  $J(0)=0$ ,  $R(0)=0$ ,  $N(0)= 1,400,050,000$ .

67 We calibrated the model (Eq. (2)) to the cases and deaths data from 12<sup>th</sup> December 2019  
68 to 22<sup>nd</sup> January 2020 by using nonlinear least squares method and thus we obtained the point  
69 estimate of the transmission rate  $\beta$ , the decay in transmission rate due to integrated  
70 interventions  $m$ , and the disease-induced death rate  $\mu$ . Then we used these estimated values as  
71 prior information in MCMC methods with a Metropolis-Hastings (M-H) algorithm [7]  
72 implemented by *Matlab* 2019. The algorithm was ran for 10,000 iterations with a burn-in  
73 (some iterations at the beginning of an MCMC run are throw away) of 5000 iterations, and  
74 we used the rest 5000 iterations to derive the mean value and 95% CI of parameters. We  
75 estimated the mean incubation time  $1/k$  as 5.0265 (95%CI: 4.9337-5.1228) days, the mean  
76 'time from symptoms onset to isolation'  $1/\alpha$  as 6.1388 (5.9676-6.3200) days, the  
77 transmission rate  $\beta$  as 0.7676 (0.7403-0.7949), the decay in transmission rate due to  
78 integrated interventions  $m$  as 0.0204 (0.0202-0.0206), and the disease-induced death rate  $\mu$  as  
79 0.0207 (0.0170-0.0243).

80 Based on these estimated parameter values, we used the model (Eq. (1)-(2)) to forecast the  
81 epidemic trend (including cumulative cases and deaths, effective reproduction number, and  
82 the number of infectious individuals) over a 10-months period since the epidemic initiation  
83 (Figure 1a-b in the main text). We also explored how the reduction in the duration from  
84 symptoms onset to isolation ( $1/\alpha$  reduces by 1, 2, 3 days) and changes in decay of  
85 transmission rate due to integrated interventions ( $m$  varies between  $0.8m$  and  $1.8m$ ) will affect  
86 the peak time and peak size as shown in Figure 1c-d in the main text.

87

88

Table S1. Reported cumulative confirmed cases and deaths data in China [3,4].

| Date       | Cases | Deaths |
|------------|-------|--------|
| 2019-12-12 | 1     | 0      |
| 2020-1-10  | 41    | 1      |
| 2020-1-11  | 41    | 1      |
| 2020-1-12  | 41    | 1      |
| 2020-1-13  | 41    | 1      |
| 2020-1-14  | 41    | 1      |
| 2020-1-15  | 41    | 2      |
| 2020-1-16  | 45    | 2      |
| 2020-1-17  | 62    | 2      |
| 2020-1-18  | 121   | 3      |
| 2020-1-19  | 198   | 4      |
| 2020-1-20  | 291   | 6      |
| 2020-1-21  | 440   | 9      |
| 2020-1-22  | 571   | 17     |

89

## 90 References

- 91 [1]. A Cintrón-Arias, C Castillo-Chávez, L Betencourt, et al. The estimation of the effective  
92 reproductive number from disease outbreak data. *Math Biosci Eng.* 2009; 6(2):261-282.
- 93 [2]. Althaus CL. Estimating the reproduction number of Zaire ebolavirus (EBOV) during the  
94 2014 outbreak in West Africa. *PLoS Curr.* 2014; 1-5. doi:  
95 10.1371/currents.outbreaks.91afb5e0f279e7f29e7056095255b288
- 96 [3]. Wuhan Municipal Health Commission. Daily report about 2019-nCov.  
97 <http://wjw.wuhan.gov.cn/front/web/list2nd/no/710> [Accessed 23 Jan 2020]
- 98 [4]. National Health Commission of the People's Republic of China. Daily report about  
99 2019-nCov. <http://www.nhc.gov.cn/> [Accessed 23 Jan 2020]
- 100 [5]. Imai N, Dorigatti I, Cori A, et al. Estimating the potential total number of novel  
101 Coronavirus cases in Wuhan City, China. [https://www.imperial.ac.uk/mrc-global-](https://www.imperial.ac.uk/mrc-global-infectious-disease-analysis/news--wuhan-coronavirus/)  
102 [infectious-disease-analysis/news--wuhan-coronavirus/](https://www.imperial.ac.uk/mrc-global-infectious-disease-analysis/news--wuhan-coronavirus/) [Accessed 23 Jan 2020]
- 103 [6]. Xinjing News. Preliminary determination for the new coronavirus, one diagram for  
104 Wuhan nCov. <http://www.bjnews.com.cn/graphic/2020/01/09/672025.html> [Accessed 23  
105 Jan 2020]
- 106 [7]. Sina News. The population size of China exceeds 1.4 billion.  
107 <https://news.sina.com.cn/c/2020-01-17/doc-iihnzhha3008993.shtml> [Accessed 23 Jan  
108 2020]
- 109 [8]. Haario H, Laine M, Mira A, et al. Dram: Efficient adaptive MCMC. *Stat Comput*  
110 2006;16:339-54.
